# Supplementary material
Source: Springer Nature journal article supplement (https://www.springermedizin.de/resource/supplementary/12874_2009_388_MOESM2_ESM.pdf/9434370)
Supplement: MOESM2 [file 9434370]

**HOUSEHOLDER NUMBER DIARY CARD**

**HOUSEHOLD CODE NO:**  
0001

Day, date and time all diary cards commenced:

.....Wednesday 17/7/05 7.00am

Please enter a number into each box even if zero

| Day       | Numbers of people overnight |                      |
|-----------|-----------------------------|----------------------|
|           | 18 years old and older      | 17 years and younger |
| Monday    | 2                           | 0                    |
| Tuesday   | 2                           | 0                    |
| Wednesday | 2                           | 0                    |
| Thursday  | 3                           | 0                    |
| Friday    | 2                           | 0                    |
| Saturday  | 2                           | 2                    |
| Sunday    | 2                           | 0                    |

| Number of recycled water taps | Outside house | Inside house |
|-------------------------------|---------------|--------------|
|                               | 2             | 0            |

**HOUSEHOLDER NUMBER DIARY CARD**

**HOUSEHOLD CODE NO:**

Day, date and time all diary cards commenced:

.....

Please enter a number into each box even if zero

| Day       | Numbers of people overnight |                      |
|-----------|-----------------------------|----------------------|
|           | 18 years old and older      | 17 years and younger |
| Monday    |                             |                      |
| Tuesday   |                             |                      |
| Wednesday |                             |                      |
| Thursday  |                             |                      |
| Friday    |                             |                      |
| Saturday  |                             |                      |
| Sunday    |                             |                      |

| Number of recycled water taps | Outside house | Inside house |
|-------------------------------|---------------|--------------|
|                               |               |              |

**HOUSEHOLD  
CODE NO:  
0001**

**LAUNDRY (WASHING MACHINE) DIARY CARD**

Day, date and time diary commenced: Wednesday 17/7/05 7.00am

*Please enter a tick against the appropriate day each time your clothes are washed*

|                       |              |            |
|-----------------------|--------------|------------|
| Machine type (circle) | Front loader | Top loader |
| Brand and Model       | Asko HY123   |            |

| Day       | Water level |   |   |   | Water temperature |   |   | Cycle type |    |
|-----------|-------------|---|---|---|-------------------|---|---|------------|----|
|           | L           | M | H | A | C                 | W | H | DD         | SD |
| Monday    | √           |   |   |   |                   | √ |   | √          |    |
|           |             |   | √ |   |                   |   | √ |            | √  |
| Tuesday   |             |   |   |   |                   |   |   |            |    |
| Wednesday |             |   | √ |   |                   |   | √ |            | √  |
| Thursday  |             |   | √ |   |                   |   | √ |            | √  |
|           |             |   | √ |   |                   |   | √ |            | √  |
|           |             |   | √ |   |                   |   | √ |            | √  |
| Friday    |             |   |   |   |                   |   |   |            |    |
| Saturday  | √           |   |   |   |                   | √ |   | √          |    |
| Sunday    | √           |   |   |   |                   | √ |   | √          |    |

**CODES TO USE**

| Water level   | Water Temperature | Cycle types   |
|---------------|-------------------|---------------|
| L = Low       | C = Cold          | DD = drip dry |
| M = Medium    | W = Warm          | SD = spin dry |
| H = High      | H = Hot           |               |
| A = Automatic |                   |               |

*Where N<sup>o</sup> of loads is more than 3 a day enter additional ticks in box see Thursday sample*

**HOUSEHOLD  
CODE NO:**

**LAUNDRY (WASHING MACHINE) DIARY CARD**

Day, date and time diary commenced: .....

*Please enter a tick against the appropriate day each time your clothes are washed*

|                       |              |            |
|-----------------------|--------------|------------|
| Machine type (circle) | Front loader | Top loader |
| Brand and Model       |              |            |

| Day       | Water level |   |   |   | Water temperature |   |   | Cycle type |    |
|-----------|-------------|---|---|---|-------------------|---|---|------------|----|
|           | L           | M | H | A | C                 | W | H | DD         | SD |
| Monday    |             |   |   |   |                   |   |   |            |    |
| Tuesday   |             |   |   |   |                   |   |   |            |    |
| Wednesday |             |   |   |   |                   |   |   |            |    |
| Thursday  |             |   |   |   |                   |   |   |            |    |
| Friday    |             |   |   |   |                   |   |   |            |    |
| Saturday  |             |   |   |   |                   |   |   |            |    |
| Sunday    |             |   |   |   |                   |   |   |            |    |

**CODES TO USE**

| Water level   | Water Temperature | Cycle types   |
|---------------|-------------------|---------------|
| L = Low       | C = Cold          | DD = drip dry |
| M = Medium    | W = Warm          | SD = spin dry |
| H = High      | H = Hot           |               |
| A = Automatic |                   |               |

*Where N<sup>o</sup> of loads is more than 3 a day enter additional ticks in box see Thursday sample*

**OUTDOOR GARDEN WATERING DIARY CARD**

Day, date and time diary card commenced: Wednesday 17/7/05 7.00am

Water used for garden watering (tick one box):

Recycled water only

Drinking water only

**HOUSEHOLD CODE NO**

0001

Both recycled and drinking water

|                                                | Monday |  |  | Tuesday |           |  | Wednesday |  |  | Thursday |     |  | Friday |     |  | Saturday |  |  | Sunday |  |  |
|------------------------------------------------|--------|--|--|---------|-----------|--|-----------|--|--|----------|-----|--|--------|-----|--|----------|--|--|--------|--|--|
| <b>Method</b>                                  | AS     |  |  | AS      | WCB       |  | AS        |  |  | AS       | HH  |  | AS     | HH  |  | AS       |  |  | AS     |  |  |
| <b>Duration (minutes or number of buckets)</b> | 20m    |  |  | 20m     | 10buckets |  | 20m       |  |  | 20m      | 10m |  | 20m    | 10m |  | 20m      |  |  | 20m    |  |  |
| <b>Total number people in garden</b>           | 0      |  |  | 0       | 1         |  | 0         |  |  | 0        | 2   |  | 0      | 2   |  | 0        |  |  | 0      |  |  |

**METHOD CODES TO USE:**

|                                              |                                  |
|----------------------------------------------|----------------------------------|
| AS = Automatic box irrigation controller     | MS = Manual operation, tap timer |
| HH = Hand held hose (with or without nozzle) | HS = Hose and sprinkler          |
| ES = Electronic tap timer                    | WCB = Watering can or bucket     |
| SH = Soaker Hose                             |                                  |

**OUTDOOR GARDEN WATERING DIARY CARD**

Day, date and time diary card commenced:.....

Water used for garden watering (tick one box):

Recycled water only

Drinking water only

**HOUSEHOLD CODE NO**

Both recycled and drinking water

|                                                | Monday |  |  | Tuesday |  |  | Wednesday |  |  | Thursday |  |  | Friday |  |  | Saturday |  |  | Sunday |  |  |
|------------------------------------------------|--------|--|--|---------|--|--|-----------|--|--|----------|--|--|--------|--|--|----------|--|--|--------|--|--|
| <b>Method</b>                                  |        |  |  |         |  |  |           |  |  |          |  |  |        |  |  |          |  |  |        |  |  |
| <b>Duration (minutes or number of buckets)</b> |        |  |  |         |  |  |           |  |  |          |  |  |        |  |  |          |  |  |        |  |  |
| <b>Total number people in garden</b>           |        |  |  |         |  |  |           |  |  |          |  |  |        |  |  |          |  |  |        |  |  |

**METHOD CODES TO USE:**

|                                              |                                  |
|----------------------------------------------|----------------------------------|
| AS = Automatic box irrigation controller     | MS = Manual operation, tap timer |
| HH = Hand held hose (with or without nozzle) | HS = Hose and sprinkler          |
| ES = Electronic tap timer                    | WCB = Watering can or bucket     |
| SH = Soaker Hose                             |                                  |

**OUTDOOR USAGE DIARY CARD**

**HOUSEHOLD CODE NO**  
0001

Day, date and time diary card commenced: Wednesday 17/7/05 7.00am

Type of water used for outdoor purposes detailed below (tick one box):

Recycled water only  Drinking water only  Both recycled and drinking water

| Activity                               |                        | Monday | Tuesday | Wednesday | Thursday | Friday   | Saturday | Sunday |
|----------------------------------------|------------------------|--------|---------|-----------|----------|----------|----------|--------|
| CAR WASH                               | Method                 |        |         |           | HH       |          |          |        |
|                                        | Duration               |        |         |           | 10min    |          |          |        |
|                                        | N <sup>o</sup> persons |        |         |           | 2        |          |          |        |
| HARD SURFACE WASH (eg. Paths, windows) | Method                 |        |         |           | HPD      |          |          |        |
|                                        | Duration               |        |         |           | 20min    |          |          |        |
|                                        | N <sup>o</sup> persons |        |         |           | 2        |          |          |        |
| OTHER Specify <u>Pet washing</u>       | Method                 |        |         |           |          | WCB      |          |        |
|                                        | Duration               |        |         |           |          | 9buckets |          |        |
|                                        | N <sup>o</sup> persons |        |         |           |          | 2        |          |        |
| OTHER Specify <u>Pond fill</u>         | Method                 |        | HH      |           |          |          |          |        |
|                                        | Duration               |        | 20min   |           |          |          |          |        |
|                                        | N <sup>o</sup> persons |        | 2       |           |          |          |          |        |

**CODES TO USE:**

|        |                                                                                |                                                      |                                                                                   |
|--------|--------------------------------------------------------------------------------|------------------------------------------------------|-----------------------------------------------------------------------------------|
| Method | HH = Hand held hose (with or without nozzle)                                   | WCB = Watering can or bucket                         | HPD= High pressure device                                                         |
| Other  | Swimming pool, pond, fountain fill, pet water, boat wash, pet wash / rinse etc | Duration: In minutes or total number of buckets used | N <sup>o</sup> persons: Number of persons present for all or part of the activity |

To fill in card see sample diary card on reverse

**OUTDOOR USAGE DIARY CARD**

**HOUSEHOLD CODE NO**

Day, date and time diary card commenced: .....

Type of water used for outdoor purposes detailed below (tick one box):

Recycled water only  Drinking water only  Both recycled and drinking water

| Activity                               |                        | Monday | Tuesday | Wednesday | Thursday | Friday | Saturday | Sunday |
|----------------------------------------|------------------------|--------|---------|-----------|----------|--------|----------|--------|
| CAR WASH                               | Method                 |        |         |           |          |        |          |        |
|                                        | Duration               |        |         |           |          |        |          |        |
|                                        | N <sup>o</sup> persons |        |         |           |          |        |          |        |
| HARD SURFACE WASH (eg. Paths, windows) | Method                 |        |         |           |          |        |          |        |
|                                        | Duration               |        |         |           |          |        |          |        |
|                                        | N <sup>o</sup> persons |        |         |           |          |        |          |        |
| OTHER Specify .....                    | Method                 |        |         |           |          |        |          |        |
|                                        | Duration               |        |         |           |          |        |          |        |
|                                        | N <sup>o</sup> persons |        |         |           |          |        |          |        |
| OTHER Specify .....                    | Method                 |        |         |           |          |        |          |        |
|                                        | Duration               |        |         |           |          |        |          |        |
|                                        | N <sup>o</sup> persons |        |         |           |          |        |          |        |

**CODES TO USE:**

|        |                                                                                |                                                      |                                                                                   |
|--------|--------------------------------------------------------------------------------|------------------------------------------------------|-----------------------------------------------------------------------------------|
| Method | HH = Hand held hose (with or without nozzle)                                   | WCB = Watering can or bucket                         | HPD= High pressure device                                                         |
| Other  | Swimming pool, pond, fountain fill, pet water, boat wash, pet wash / rinse etc | Duration: In minutes or total number of buckets used | N <sup>o</sup> persons: Number of persons present for all or part of the activity |
